# Supplementary material
Source: publisher figshare collection journal article supplement (https://tandf.figshare.com/ndownloader/files/14162795)
Supplement: Supplementary file 1 [file 14162795]

**Search strategy of Cinahl**

| **OR** | **AND** | | |
| --- | --- | --- | --- |
| **Population** | **Intervention** | **Study design *** |
| Thoracic surgery [MH+] [tiab] (p)  Thoracotomy [MH] [tiab] (p)  Video-assisted thoracic surgery [MH] [tiab]  Video-assisted thorascopic surgery [tiab]  Lung surgery [MH+] [tiab] (p)  Lung resection [tiab] (p)  Lung resectional surgery [tiab] (p)  Lung volume reduction surgery [tiab] (p)  Lobectomy [tiab] (p) | Chest physical therapy [MH+] [tiab]  Chest physiotherapy [tiab]  Respiratory physiotherapy [tiab]  Respiratory physical therapy [tiab]  Lung physiotherapy [tiab]  Lung physical therapy [tiab]  Continuous positive airway pressure [MH] [tiab]  CPAP [tiab]  Bilevel positive airway pressure [tiab]  Biphasic positive airway pressure [tiab]  Intermittent positive pressure breathing [MH] [tiab]  Non-invasive ventilation [tiab]  Noninvasive ventilation [tiab]  Inspiratory muscle training [tiab]  Positive expiratory pressure [tiab]  Airway clearance technique [tiab] (p)  Breathing exercises [MH+] [tiab] (p)  Incentive spirometry [tiab]  Sustained maximal inspiration [tiab]  Postural drainage [MH] [tiab]  Autogenic drainage [tiab]  Bronchial drainage [tiab]  Bronchial hygiene [tiab]  ELTGOL [tiab]  Forced expiratory technique [tiab] (p)  Early ambulation [MH] [tiab]  Early mobilization [tiab] | Randomized controlled trials [MH] [tiab] [pt]  RCT [tiab] [pt]  Controlled clinical trial [pt]  Randomized [tiab]  Randomised [tiab]  Placebo [tiab]  Drug therapy [sh]  Randomly [tiab]  Trial [tiab]  Groups [tiab] |
| AND, OR denotes boolean operators  [MH] denotes Cinahl Headings  [MH+] denotes Cinahl Heading (exploded)  [tiab]denotes search in title and abstract  [ab] denotes search in abstract  [pt] denotes search in publication type  (p) denotes search in both single and plural  * Inspired by *Cochrane Highly Sensitive Search Strategy for identifying randomised trials for MEDLINE (reference)* | | |
